# Supplementary material for: Transcriptomic Characterization of Tuberculous Sputum Reveals a Host Warburg Effect and Microbial Cholesterol Catabolism
Source: PubMed Central journal article supplement (PMC8649757; doi:10.1128/mbio.01766-21), 2021-12-07
Supplement: mbio.01766-21-sf002.pdf [file mbio.01766-21-sf002.pdf]

## SI Figure S2

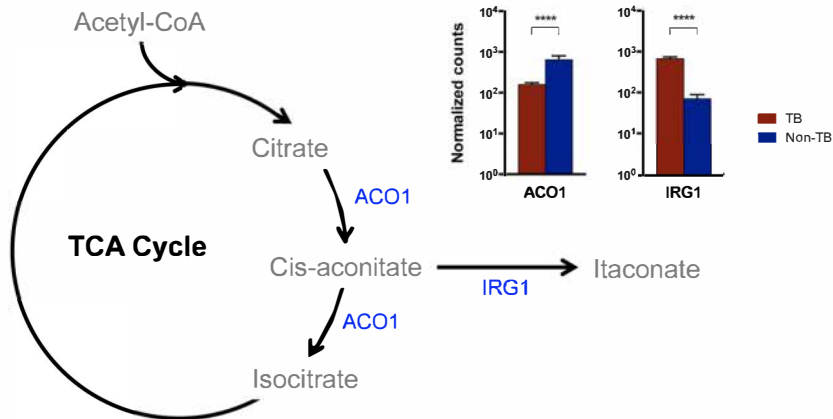

### Supplemental Data Figure S2. Itaconate biosynthesis in the host

The TCA cycle of the host in TB sputa was similar to the pattern previously described in M1 inflammatory macrophages, broken after citrate and resulted in increased production of itaconate. The ACO1 enzyme that converts citrate to cis-aconitate and isocitrate was significantly downregulated, while IRG1 that mediates conversion to itaconate was significantly induced in TB sputa.
